# Supplementary material for: The CaSR Modulator NPS-2143 Reduced UV-Induced DNA Damage in Skh:hr1 Hairless Mice but Minimally Inhibited Skin Tumours
Source: MDPI journal article supplement (doi:10.3390/ijms24054921), 2023-03-03
Supplement: s1 [file s1]

Supplementary Materials:

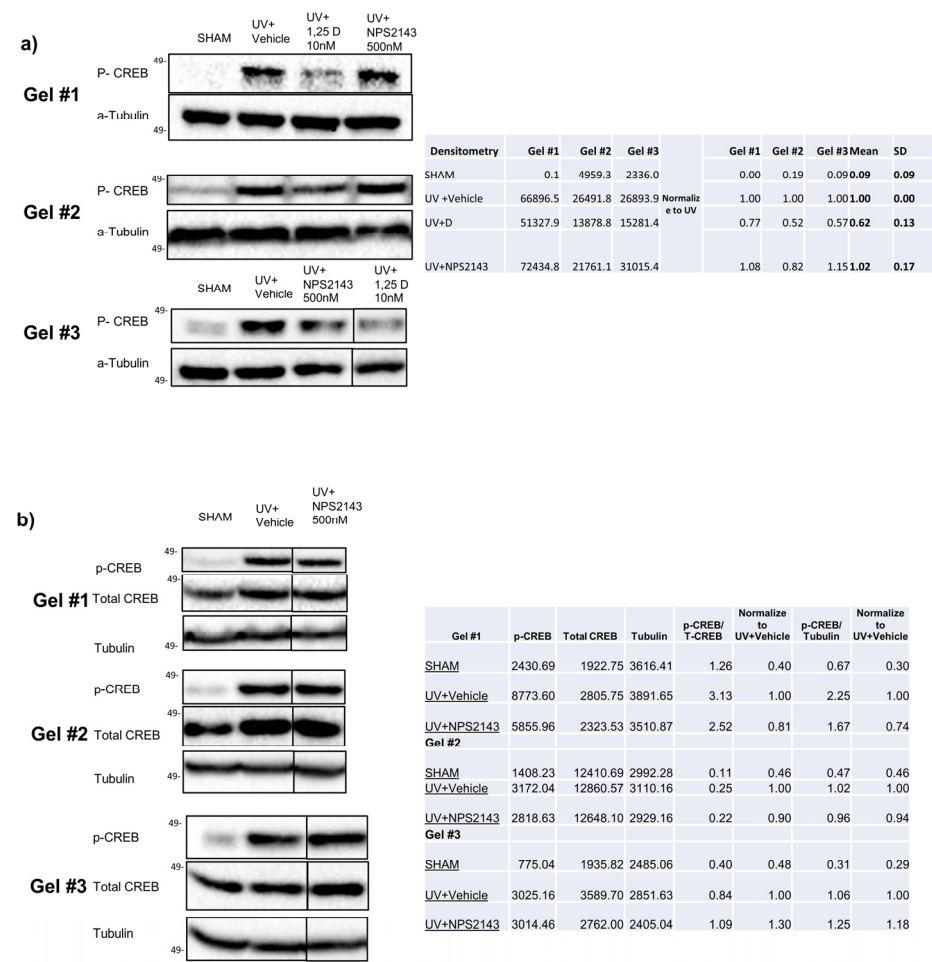

Figure S1. Western Blot and densitometry of a) p-CREB and Tubulin.b) p-CREB, total CREB and tubulin. Human keratinocytes cultured in 96 well plates were irradiated with 400 mJ/cm<sup>2</sup> UVB followed by treatment with vehicle, 10nM 1,25(OH)<sub>2</sub>D<sub>3</sub> or 500 nM NPS-2143 in the presence of 1 mM CaCl<sub>2</sub> for 90min. In pannel a) and b) blot was cut at the balck solid line to remove a lane tested on compound X ( not to be disclosed). Triplicates blot and densitometry data in the table from b) were used to generate data in Figure 4f. Gel #1in b) is the representative blot for Figure 4f.

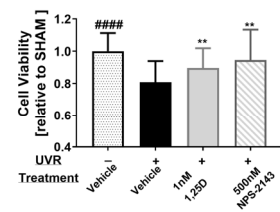

Figure S2 Cell Viability by CTB assay analysed at 3 hours post UV with treatments as indicated on primary keratinocytes Media contained 1.0 mM Ca<sup>2+</sup>. Data was presented as fluorescence values (Mean +SEM) normalized to SHAM. n=5 \*\* p<0.01, F(1.546, 32.47) = 6.870 compared with UV+Vehicle by linear mix model. ####, p<0.0001, significantly different from UV+Vehicle by T-test (t=5.180, df=42).

### **Methods for supplementary Figure S1a**

#### **Cell viability by Cell Titer Blue Assay**

Human keratinocytes were irradiated with an Oriel 1000W xenon-arc lamp solar simulator (Newport Corporation) and then treated with vehicle, 1, 25D and NPS-2143 as previously [26]. Cell viability was determined using the Cell Titer-Blue® Cell Viability Assay (Promega, USA) according to the manufacturer's instructions.
